# Supplementary material for: Changes in the Sensory Odor Profile during Chorizo Maturation and Their Relationship with Volatile Compound Patterns by Partial Least Square Regression (PLS)
Source: MDPI journal article supplement (doi:10.3390/foods12050932), 2023-02-22
Supplement: s1 [file s1]

## Supplementary Material

**Table S1.** Means of the eight odors evaluated by a trained panel during ripening.

| Odor      | Day of ripening   |                   |                   |                    |                    |                   | Factor |     |     |
|-----------|-------------------|-------------------|-------------------|--------------------|--------------------|-------------------|--------|-----|-----|
|           | D0                | D5                | D12               | D19                | D26                | D33               | Rip    | Jud | Ses |
| Vinegar   | 3.6 <sup>cd</sup> | 4.3 <sup>bc</sup> | 5.9 <sup>a</sup>  | 6.5 <sup>a</sup>   | 4.5 <sup>b</sup>   | 3.5 <sup>d</sup>  | ***    | *   | n.s |
| Fermented | 3.9 <sup>c</sup>  | 4.3 <sup>c</sup>  | 7.0 <sup>ab</sup> | 7.5 <sup>a</sup>   | 7.4 <sup>ab</sup>  | 6.5 <sup>b</sup>  | ***    | *** | n.s |
| Pepper    | 4.9 <sup>ab</sup> | 5.5 <sup>a</sup>  | 5.5 <sup>a</sup>  | 4.4 <sup>b</sup>   | 4.9 <sup>ab</sup>  | 5.4 <sup>a</sup>  | **     | **  | n.s |
| Chili     | 6.3 <sup>a</sup>  | 5.2 <sup>bc</sup> | 5.7 <sup>ab</sup> | 5.4 <sup>abc</sup> | 5.8 <sup>ab</sup>  | 4.6 <sup>c</sup>  | ***    | **  | n.s |
| Rancid    | 3.8 <sup>c</sup>  | 3.8 <sup>c</sup>  | 6.1 <sup>b</sup>  | 6.0 <sup>b</sup>   | 7.0 <sup>a</sup>   | 5.9 <sup>b</sup>  | ***    | *   | n.s |
| Pork meat | 6.1 <sup>a</sup>  | 4.7 <sup>bc</sup> | 3.8 <sup>d</sup>  | 4.2 <sup>cd</sup>  | 4.5 <sup>bcd</sup> | 5.2 <sup>b</sup>  | *      | *** | n.s |
| Garlic    | 2.8 <sup>b</sup>  | 4.4 <sup>ab</sup> | 4.2 <sup>ab</sup> | 4.25 <sup>ab</sup> | 5.3 <sup>a</sup>   | 4.6 <sup>a</sup>  | **     | *   | n.s |
| Greasy    | 5.4 <sup>b</sup>  | 6.1 <sup>a</sup>  | 4.2 <sup>b</sup>  | 5.2 <sup>b</sup>   | 5.4 <sup>b</sup>   | 5.6 <sup>ab</sup> | ***    | *** | n.s |

Rip: Effect of ripening, Jud: Effect of judges, Ses: Effect of session.

\*significant (p<0.05), \*\*significant (p<0.01), \*\*\*significant (p<0.001), n.s, no significance.

<sup>abc</sup> Different letter in row show significant differences p<0.05 by Tukey test during ripening

**Table S2.** Means and standard deviations of volatile compounds, grouped according to their chemical class, were expressed in UA (1x10<sup>-5</sup>) during 0, 5, 12, 19, 26 and 33 days of ripening.

| IVC                     | LRI  | I | Compound <sup>A</sup> | D0                          | D5                          | D12                         | D19                         | D26                         | D33                          | Sig <sup>B</sup> |
|-------------------------|------|---|-----------------------|-----------------------------|-----------------------------|-----------------------------|-----------------------------|-----------------------------|------------------------------|------------------|
| <b><i>Alkane</i></b>    |      |   |                       |                             |                             |                             |                             |                             |                              |                  |
| A1                      | 500  | d | Pentane               | 0.16 ± 0.026 <sup>a</sup>   | 0.059 ± 0.025 <sup>ab</sup> | 0.088 ± 0.102 <sup>ab</sup> | 0.032 ± 0.008 <sup>b</sup>  | 0.056 ± 0.017 <sup>ab</sup> | 0.142 ± 0.0115 <sup>ab</sup> | *                |
| A2                      | 600  | a | Hexane                | 0.141 ± 0.120 <sup>a</sup>  | 0.111 ± 0.157 <sup>a</sup>  | 0.065 ± 0.013 <sup>a</sup>  | 0.116 ± 0.006 <sup>a</sup>  | 0.078 ± 0.054 <sup>a</sup>  | 0.076 ± 0.047 <sup>a</sup>   | n.s              |
| A3                      | 669  | e | Isobutane             | 0.025 ± 0.019 <sup>b</sup>  | 0.134 ± 0.087 <sup>ab</sup> | 0.150 ± 0.036 <sup>a</sup>  | 0.120 ± 0.025 <sup>ab</sup> | 0.059 ± 0.020 <sup>ab</sup> | 0.097 ± 0.021 <sup>ab</sup>  | *                |
| A4                      | 800  | a | Octane                | 0.193 ± 0.120 <sup>ab</sup> | 0.073 ± 0.076 <sup>b</sup>  | 0.059 ± 0.005 <sup>b</sup>  | 0.066 ± 0.038 <sup>b</sup>  | 0.328 ± 0.342 <sup>ab</sup> | 0.601 ± 0.283 <sup>a</sup>   | *                |
| A5                      | 900  | d | Nonane                | 0.090 ± 0.002 <sup>a</sup>  | 0.103 ± 0.023 <sup>a</sup>  | 0.088 ± 0.020 <sup>a</sup>  | 0.055 ± 0.035 <sup>a</sup>  | 0.076 ± 0.016 <sup>a</sup>  | 0.057 ± 0.016 <sup>a</sup>   | n.s              |
| A6                      | 1000 | a | Decane                | 0.121 ± 0.047 <sup>a</sup>  | 0.218 ± 0.064 <sup>a</sup>  | 0.171 ± 0.043 <sup>a</sup>  | 0.172 ± 0.028 <sup>a</sup>  | 0.200 ± 0.041 <sup>a</sup>  | 0.154 ± 0.032 <sup>a</sup>   | n.s              |
| A7                      | 1098 | e | 2,4-Dimethyldecane    | 0.089 ± 0.054 <sup>a</sup>  | 0.116 ± 0.067 <sup>a</sup>  | 0.232 ± 0.095 <sup>a</sup>  | 0.189 ± 0.023 <sup>a</sup>  | 0.186 ± 0.083 <sup>a</sup>  | 0.175 ± 0.097 <sup>a</sup>   | n.s              |
| A8                      | 1100 | a | Undecane              | 0.809 ± 0.497 <sup>bc</sup> | 0.622 ± 0.239 <sup>c</sup>  | 2.476 ± 0.455 <sup>ab</sup> | 2.657 ± 0.222 <sup>a</sup>  | 2.419 ± 0.997 <sup>ab</sup> | 1.960 ± 0.916 <sup>abc</sup> | **               |
| A9                      | 1200 | a | Dodecane              | 1.255 ± 0.582 <sup>a</sup>  | 0.774 ± 0.256 <sup>ab</sup> | 0.371 ± 0.036 <sup>b</sup>  | 0.394 ± 0.035 <sup>b</sup>  | 0.540 ± 0.255 <sup>ab</sup> | 0.510 ± 0.264 <sup>ab</sup>  | *                |
| A10                     | 1300 | a | Tridecane             | 0.075 ± 0.038 <sup>a</sup>  | 0.210 ± 0.195 <sup>a</sup>  | 0.122 ± 0.030 <sup>a</sup>  | 0.106 ± 0.029 <sup>a</sup>  | 0.064 ± 0.011 <sup>a</sup>  | 0.079 ± 0.029 <sup>a</sup>   | n.s              |
| A11                     | 1400 | d | Tetradecane           | 0.019 ± 0.012 <sup>b</sup>  | 0.014 ± 0.006 <sup>b</sup>  | 0.015 ± 0.000 <sup>b</sup>  | 0.014 ± 0.003 <sup>b</sup>  | 0.014 ± 0.004 <sup>b</sup>  | 0.063 ± 0.031 <sup>a</sup>   | **               |
| <b><i>Aldehydes</i></b> |      |   |                       |                             |                             |                             |                             |                             |                              |                  |
| AD1                     | 521  | c | Propanal              | 0.093 ± 0.039 <sup>b</sup>  | 0.116 ± 0.078 <sup>b</sup>  | 1.115 ± 0.259 <sup>a</sup>  | 1.478 ± 0.273 <sup>a</sup>  | 0.275 ± 0.048 <sup>b</sup>  | 0.167 ± 0.073 <sup>b</sup>   | ***              |
| AD2                     | 590  | c | 2-Methylpropanal      | 0.505 ± 0.241 <sup>a</sup>  | 0.366 ± 0.077 <sup>a</sup>  | 0.714 ± 0.175 <sup>a</sup>  | 0.933 ± 0.288 <sup>a</sup>  | 0.373 ± 0.059 <sup>a</sup>  | 0.530 ± 0.284 <sup>a</sup>   | n.s              |
| AD3                     | 619  | c | Butanal               | 0.076 ± 0.017 <sup>c</sup>  | 0.173 ± 0.118 <sup>bc</sup> | 0.415 ± 0.038 <sup>ab</sup> | 0.570 ± 0.152 <sup>a</sup>  | 0.146 ± 0.116 <sup>c</sup>  | 0.042 ± 0.002 <sup>c</sup>   | ***              |
| AD4                     | 689  | c | 3-Methylbutanal       | 0.062 ± 0.047 <sup>a</sup>  | 0.023 ± 0.021 <sup>a</sup>  | 0.027 ± 0.027 <sup>a</sup>  | 0.014 ± 0.005 <sup>a</sup>  | 0.068 ± 0.064 <sup>a</sup>  | 0.067 ± 0.042 <sup>a</sup>   | n.s              |
| AD5                     | 692  | c | 2-Methylbutanal       | 0.071 ± 0.059 <sup>a</sup>  | 0.017 ± 0.005 <sup>a</sup>  | 0.020 ± 0.006 <sup>a</sup>  | 0.020 ± 0.007 <sup>a</sup>  | 0.055 ± 0.045 <sup>a</sup>  | 0.053 ± 0.032 <sup>a</sup>   | n.s              |
| AD6                     | 734  | a | Pentanal              | 0.218 ± 0.140 <sup>a</sup>  | 0.129 ± 0.040 <sup>a</sup>  | 0.174 ± 0.042 <sup>a</sup>  | 0.318 ± 0.177 <sup>a</sup>  | 0.278 ± 0.049 <sup>a</sup>  | 0.176 ± 0.022 <sup>a</sup>   | n.s              |
| AD7                     | 836  | a | Hexanal               | 1.375 ± 0.569 <sup>c</sup>  | 1.691 ± 0.800 <sup>c</sup>  | 7.882 ± 2.297 <sup>ab</sup> | 4.900 ± 1.023 <sup>bc</sup> | 9.175 ± 2.101 <sup>a</sup>  | 8.602 ± 0.954 <sup>ab</sup>  | ***              |

| IC                      | LRI  | I | Compound <sup>A</sup>      | D0                          | D5                           | D12                         | D19                         | D26                          | D33                         | Sig <sup>B</sup> |
|-------------------------|------|---|----------------------------|-----------------------------|------------------------------|-----------------------------|-----------------------------|------------------------------|-----------------------------|------------------|
| AD8                     | 904  | a | (E)-Hex-2-enal             | 0.052 ± 0.024 <sup>a</sup>  | 0.008 ± 0.008 <sup>a</sup>   | 0.022 ± 0.006 <sup>a</sup>  | 0.025 ± 0.013 <sup>a</sup>  | 0.044 ± 0.041 <sup>a</sup>   | 0.078 ± 0.043 <sup>a</sup>  | n.s              |
| AD9                     | 946  | c | Heptanal                   | 0.618 ± 0.151 <sup>bc</sup> | 1.270 ± 0.471 <sup>abc</sup> | 1.982 ± 0.242 <sup>a</sup>  | 1.657 ± 0.171 <sup>ab</sup> | 1.481 ± 0.722 <sup>abc</sup> | 0.412 ± 0.553 <sup>c</sup>  | **               |
| AD10                    | 968  | c | (2E,4E)-Hexa-2,4-dienal    | 0.126 ± 0.084 <sup>a</sup>  | 0.083 ± 0.049 <sup>a</sup>   | 0.077 ± 0.042 <sup>a</sup>  | 0.061 ± 0.012 <sup>a</sup>  | 0.078 ± 0.027 <sup>a</sup>   | 0.096 ± 0.035 <sup>a</sup>  | n.s              |
| AD11                    | 1007 | a | (E)-Hept-2-enal            | 0.523 ± 0.096 <sup>a</sup>  | 1.064 ± 0.620 <sup>a</sup>   | 1.400 ± 0.219 <sup>a</sup>  | 0.968 ± 0.375 <sup>a</sup>  | 1.303 ± 0.310 <sup>a</sup>   | 1.133 ± 0.389 <sup>a</sup>  | n.s              |
| AD12                    | 1010 | a | Benzaldehyde               | 0.539 ± 0.414 <sup>a</sup>  | 0.292 ± 0.149 <sup>a</sup>   | 0.452 ± 0.021 <sup>a</sup>  | 0.564 ± 0.031 <sup>a</sup>  | 0.853 ± 0.210 <sup>a</sup>   | 0.686 ± 0.373 <sup>a</sup>  | n.s              |
| AD13                    | 1048 | a | (2E,4E)-Hepta-2,4-dienal   | 0.406 ± 0.415 <sup>a</sup>  | 0.211 ± 0.185 <sup>a</sup>   | 0.097 ± 0.019 <sup>a</sup>  | 0.070 ± 0.023 <sup>a</sup>  | 0.178 ± 0.133 <sup>a</sup>   | 0.230 ± 0.178 <sup>a</sup>  | n.s              |
| AD14                    | 1064 | a | (2E,4E)-Hepta-2,4-dienal   | 0.550 ± 0.255 <sup>a</sup>  | 0.713 ± 0.362 <sup>a</sup>   | 0.976 ± 0.353 <sup>a</sup>  | 0.646 ± 0.165 <sup>a</sup>  | 1.001 ± 0.628 <sup>a</sup>   | 0.468 ± 0.169 <sup>a</sup>  | n.s              |
| AD17                    | 1146 | c | Nonanal                    | 1.807 ± 1.011 <sup>b</sup>  | 2.524 ± 0.179 <sup>ab</sup>  | 2.346 ± 0.292 <sup>ab</sup> | 2.412 ± 0.245 <sup>ab</sup> | 3.665 ± 0.391 <sup>a</sup>   | 2.468 ± 0.411 <sup>ab</sup> | *                |
| AD18                    | 1173 | b | (2E,4E)-Octa-2,4-dienal    | 0.051 ± 0.026 <sup>a</sup>  | 0.048 ± 0.013 <sup>a</sup>   | 0.031 ± 0.019 <sup>a</sup>  | 0.030 ± 0.010 <sup>a</sup>  | 0.077 ± 0.051 <sup>a</sup>   | 0.132 ± 0.086 <sup>a</sup>  | n.s              |
| AD19                    | 1215 | a | (E)-Non-2-enal             | 0.026 ± 0.012 <sup>a</sup>  | 0.020 ± 0.011 <sup>a</sup>   | 0.042 ± 0.020 <sup>a</sup>  | 0.034 ± 0.013 <sup>a</sup>  | 0.034 ± 0.010 <sup>a</sup>   | 0.029 ± 0.007 <sup>a</sup>  | n.s              |
| AD20                    | 1238 | e | 4-Ethylbenzaldehyde        | 0.008 ± 0.002 <sup>b</sup>  | 0.274 ± 0.176 <sup>a</sup>   | 0.301 ± 0.017 <sup>a</sup>  | 0.247 ± 0.040 <sup>a</sup>  | 0.327 ± 0.053 <sup>a</sup>   | 0.318 ± 0.041 <sup>a</sup>  | **               |
| AD21                    | 1280 | c | (2E,4E)-Nona-2,4-dienal    | 0.042 ± 0.027 <sup>a</sup>  | 0.321 ± 0.179 <sup>a</sup>   | 0.340 ± 0.091 <sup>a</sup>  | 0.171 ± 0.018 <sup>a</sup>  | 0.245 ± 0.195 <sup>a</sup>   | 0.288 ± 0.110 <sup>a</sup>  | n.s              |
| AD22                    | 1323 | e | Benzene-1,3-dicarbaldehyde | 0.019 ± 0.024 <sup>b</sup>  | 0.132 ± 0.064 <sup>ab</sup>  | 0.218 ± 0.102 <sup>a</sup>  | 0.143 ± 0.020 <sup>ab</sup> | 0.151 ± 0.043 <sup>ab</sup>  | 0.304 ± 0.080 <sup>a</sup>  | **               |
| AD23                    | 1364 | e | (2E,4E)-Deca-2,4-dienal    | 0.019 ± 0.001 <sup>a</sup>  | 0.015 ± 0.005 <sup>a</sup>   | 0.010 ± 0.001 <sup>a</sup>  | 0.008 ± 0.004 <sup>a</sup>  | 0.014 ± 0.009 <sup>a</sup>   | 0.030 ± 0.018 <sup>a</sup>  | ns               |
| <b><u>Alcoholes</u></b> |      |   |                            |                             |                              |                             |                             |                              |                             |                  |
| L1                      | 504  | b | Ethanol                    | 0.463 ± 0.097 <sup>b</sup>  | 1.288 ± 0.378 <sup>b</sup>   | 12.617 ± 0.95 <sup>a</sup>  | 14.850 ± 3.954 <sup>a</sup> | 4.011 ± 0.469 <sup>b</sup>   | 3.936 ± 2.086 <sup>b</sup>  | ***              |
| L2                      | 563  | e | Cyclobutanol               | 0.011 ± 0.009 <sup>a</sup>  | 0.024 ± 0.024 <sup>a</sup>   | 0.298 ± 0.273 <sup>a</sup>  | 0.077 ± 0.106 <sup>a</sup>  | 0.083 ± 0.093 <sup>a</sup>   | 0.049 ± 0.022 <sup>a</sup>  | n.s              |
| L3                      | 608  | c | Propan-1-ol                | 0.344 ± 0.197 <sup>a</sup>  | 0.200 ± 0.166 <sup>ab</sup>  | 0.000 ± 0.0 <sup>b</sup>    | 0.000 ± 0.0 <sup>b</sup>    | 0.158 ± 0.061 <sup>ab</sup>  | 0.186 ± 0.111 <sup>ab</sup> | *                |
| L4                      | 683  | c | 2-Methylpropan-1-ol        | 0.060 ± 0.052 <sup>a</sup>  | 0.015 ± 0.015 <sup>a</sup>   | 0.000 ± 0.0 <sup>a</sup>    | 0.003 ± 0.001 <sup>a</sup>  | 0.024 ± 0.017 <sup>a</sup>   | 0.031 ± 0.027 <sup>a</sup>  | n.s              |
| L5                      | 726  | a | Butan-1-ol                 | 0.576 ± 0.321 <sup>ab</sup> | 1.330 ± 0.855 <sup>a</sup>   | 0.000 ± 0.0 <sup>b</sup>    | 0.000 ± 0.0 <sup>b</sup>    | 0.517 ± 0.207 <sup>ab</sup>  | 0.234 ± 0.037 <sup>b</sup>  | *                |
| L6                      | 754  | a | Pentan-2-ol                | 0.271 ± 0.187 <sup>a</sup>  | 0.294 ± 221 <sup>a</sup>     | 0.068 ± 0.032 <sup>a</sup>  | 0.095 ± 0.019 <sup>a</sup>  | 0.191 ± 0.098 <sup>a</sup>   | 0.094 ± 0.042 <sup>a</sup>  | n.s              |

| IVC          | LRI  | I | Compound <sup>A</sup>    | D0                          | D5                          | D12                         | D19                        | D26                         | D33                         | Sig <sup>B</sup> |
|--------------|------|---|--------------------------|-----------------------------|-----------------------------|-----------------------------|----------------------------|-----------------------------|-----------------------------|------------------|
| L7           | 793  | a | 3-Methylbutan-1-ol       | 0.987 ± 0.413 <sup>ab</sup> | 0.181 ± 0.112 <sup>c</sup>  | 0.296 ± 0.058 <sup>c</sup>  | 0.331 ± 0.117 <sup>c</sup> | 1.221 ± 0.123 <sup>a</sup>  | 0.423 ± 0.301 <sup>bc</sup> | ***              |
| L8           | 798  | a | 2-Methylbutan-1-ol       | 0.485 ± 0.068 <sup>b</sup>  | 0.358 ± 0.088 <sup>b</sup>  | 0.869 ± 0.157 <sup>b</sup>  | 0.949 ± 0.304 <sup>b</sup> | 2.230 ± 0.619 <sup>a</sup>  | 1.371 ± 0.655 <sup>ab</sup> | **               |
| L9           | 824  | a | Pentan-1-ol              | 0.500 ± 0.254 <sup>b</sup>  | 0.996 ± 0.173 <sup>b</sup>  | 0.887 ± 0.222 <sup>b</sup>  | 0.730 ± 0.112 <sup>b</sup> | 0.855 ± 0.103 <sup>b</sup>  | 2.586 ± 0.935 <sup>a</sup>  | **               |
| L10          | 880  | a | Butane-2,3-diol          | 0.628 ± 0.250 <sup>b</sup>  | 1.224 ± 0.341 <sup>ab</sup> | 1.767 ± 0.203 <sup>ab</sup> | 2.370 ± 0.201 <sup>a</sup> | 1.772 ± 0.605 <sup>ab</sup> | 1.454 ± 0.690 <sup>ab</sup> | **               |
| L11          | 889  | c | Butane-2,3-diol          | 1.642 ± 1.072 <sup>a</sup>  | 1.624 ± 2.09 <sup>a</sup>   | 0.988 ± 0.203 <sup>a</sup>  | 0.957 ± 0.039 <sup>a</sup> | 1.257 ± 0.764 <sup>a</sup>  | 1.233 ± 0.548 <sup>a</sup>  | n.s              |
| L12          | 921  | c | Hexan-1-ol               | 0.535 ± 0.407 <sup>b</sup>  | 1.251 ± 0.607 <sup>b</sup>  | 1.307 ± 0.761 <sup>b</sup>  | 0.618 ± 0.141 <sup>b</sup> | 1.186 ± 0.486 <sup>b</sup>  | 6.753 ± 3.17 <sup>a</sup>   | **               |
| L13          | 926  | c | (E)-Hex-4-en-1-ol        | 0.119 ± 0.090 <sup>a</sup>  | 0.152 ± 0.128 <sup>a</sup>  | 0.188 ± 0.045 <sup>a</sup>  | 0.098 ± 0.009 <sup>a</sup> | 0.314 ± 0.301 <sup>a</sup>  | 0.312 ± 0.329 <sup>a</sup>  | n.s              |
| L14          | 952  | a | Heptan-2-ol              | 2.017 ± 1.55 <sup>a</sup>   | 0.226 ± 0.241 <sup>a</sup>  | 0.095 ± 0.020 <sup>a</sup>  | 0.098 ± 0.027 <sup>a</sup> | 0.109 ± 0.086 <sup>a</sup>  | 0.484 ± 0.058 <sup>a</sup>  | *                |
| L15          | 1021 | a | Oct-1-en-3-ol            | 1.368 ± 1.02 <sup>a</sup>   | 2.543 ± 1.277 <sup>a</sup>  | 2.731 ± 0.778 <sup>a</sup>  | 1.641 ± 0.351 <sup>a</sup> | 3.743 ± 1.545 <sup>a</sup>  | 5.094 ± 2.643 <sup>a</sup>  | n.s              |
| L16          | 1072 | c | 2-Ethylhexan-1-ol        | 0.670 ± 0.275 <sup>a</sup>  | 1.041 ± 0.599 <sup>a</sup>  | 0.611 ± 0.102 <sup>a</sup>  | 0.392 ± 0.109 <sup>a</sup> | 0.662 ± 0.326 <sup>a</sup>  | 0.520 ± 0.237 <sup>a</sup>  | n.s              |
| L17          | 1074 | e | 3-Methylcyclopentan-1-ol | 0.800 ± 0.298 <sup>a</sup>  | 1.192 ± 0.572 <sup>a</sup>  | 1.540 ± 0.536 <sup>a</sup>  | 1.305 ± 0.261 <sup>a</sup> | 1.340 ± 0.135 <sup>a</sup>  | 1.581 ± 0.581 <sup>a</sup>  | n.s              |
| L18          | 1106 | a | Phenol                   | 0.071 ± 0.015 <sup>b</sup>  | 0.085 ± 0.010 <sup>b</sup>  | 0.101 ± 0.034 <sup>b</sup>  | 0.157 ± 0.010 <sup>a</sup> | 0.000 ± 0.00 <sup>b</sup>   | 0.000 ± 0 <sup>b</sup>      | ***              |
| L19          | 1121 | a | Octan-1-ol               | 0.157 ± 0.151 <sup>a</sup>  | 0.264 ± 0.181 <sup>a</sup>  | 0.143 ± 0.033 <sup>a</sup>  | 0.075 ± 0.024 <sup>a</sup> | 0.125 ± 0.029 <sup>a</sup>  | 0.147 ± 0.055 <sup>a</sup>  | n.s              |
| L20          | 1190 | a | 2-Phenylethanol          | 0.576 ± 0.218 <sup>a</sup>  | 0.581 ± 0.125 <sup>a</sup>  | 0.842 ± 0.375 <sup>a</sup>  | 0.736 ± 0.135 <sup>a</sup> | 0.620 ± 0.192 <sup>a</sup>  | 0.887 ± 0.086 <sup>a</sup>  | n.s              |
| <u>Acids</u> |      |   |                          |                             |                             |                             |                            |                             |                             |                  |
| C1           | 710  | a | Acetic acid              | 1.777 ± 0.829 <sup>b</sup>  | 2.244 ± 0.782 <sup>b</sup>  | 6.878 ± 2.068 <sup>a</sup>  | 7.293 ± 1.547 <sup>a</sup> | 4.643 ± 2.217 <sup>ab</sup> | 4.852 ± 1.796 <sup>ab</sup> | **               |
| C2           | 809  | a | Propanoic acid           | 0.053 ± 0.041 <sup>a</sup>  | 0.101 ± 0.076 <sup>a</sup>  | 0.224 ± 0.030 <sup>a</sup>  | 0.299 ± 0.055 <sup>a</sup> | 0.309 ± 0.404 <sup>a</sup>  | 0.322 ± 0.370 <sup>a</sup>  | n.s              |
| C3           | 894  | a | Butanoic acid            | 0.057 ± 0.027 <sup>a</sup>  | 0.093 ± 0.056 <sup>a</sup>  | 0.084 ± 0.003 <sup>a</sup>  | 0.089 ± 0.014 <sup>a</sup> | 0.068 ± 0.027 <sup>a</sup>  | 0.143 ± 0.130 <sup>a</sup>  | n.s              |
| C4           | 982  | c | Pentanoic acid           | 0.012 ± 0.002 <sup>a</sup>  | 0.042 ± 0.029 <sup>a</sup>  | 0.062 ± 0.024 <sup>a</sup>  | 0.045 ± 0.016 <sup>a</sup> | 0.029 ± 0.017 <sup>a</sup>  | 0.060 ± 0.077 <sup>a</sup>  | n.s              |
| C5           | 1062 | a | Hexanoic acid            | 0.022 ± 0.004 <sup>c</sup>  | 0.277 ± 0.202 <sup>bc</sup> | 0.481 ± 0.167 <sup>b</sup>  | 0.457 ± 0.016 <sup>b</sup> | 0.628 ± 0.096 <sup>ab</sup> | 0.934 ± 0.159 <sup>a</sup>  | ***              |

| IVC            | LRI  | I | Compound <sup>A</sup>          | D0                         | D5                          | D12                         | D19                         | D26                         | D33                         | Sig <sup>B</sup> |
|----------------|------|---|--------------------------------|----------------------------|-----------------------------|-----------------------------|-----------------------------|-----------------------------|-----------------------------|------------------|
| C6             | 1180 | a | Heptanoic acid                 | 0.793 ± 0.342 <sup>a</sup> | 1.265 ± 0.696 <sup>a</sup>  | 1.491 ± 0.886 <sup>a</sup>  | 1.457 ± 0.313 <sup>a</sup>  | 1.301 ± 0.822 <sup>a</sup>  | 0.503 ± 0.367 <sup>a</sup>  | n.s              |
| C7             | 1264 | d | Octanoic acid                  | 0.131 ± 0.069 <sup>a</sup> | 0.151 ± 0.055 <sup>a</sup>  | 0.135 ± 0.077 <sup>a</sup>  | 0.167 ± 0.084 <sup>a</sup>  | 0.116 ± 0.031 <sup>a</sup>  | 0.266 ± 0.046 <sup>a</sup>  | n.s              |
| C8             | 1283 | e | Benzoic acid                   | 0.063 ± 0.016 <sup>a</sup> | 0.125 ± 0.015 <sup>a</sup>  | 0.064 ± 0.043 <sup>a</sup>  | 0.172 ± 0.062 <sup>a</sup>  | 0.155 ± 0.078 <sup>a</sup>  | 0.119 ± 0.024 <sup>a</sup>  | n.s              |
| <u>Ketones</u> |      |   |                                |                            |                             |                             |                             |                             |                             |                  |
| K1             | 570  | a | Methyl acetate                 | 0.111 ± 0.099 <sup>a</sup> | 0.092 ± 0.066 <sup>a</sup>  | 0.091 ± 0.136 <sup>a</sup>  | 0.157 ± 0.129 <sup>a</sup>  | 0.110 ± 0.170 <sup>a</sup>  | 0.124 ± 0.160 <sup>a</sup>  | n.s              |
| K2             | 632  | a | Butan-2-one                    | 0.012 ± 0.007 <sup>a</sup> | 0.020 ± 0.007 <sup>a</sup>  | 0.021 ± 0.008 <sup>a</sup>  | 0.018 ± 0.001 <sup>a</sup>  | 0.015 ± 0.002 <sup>a</sup>  | 0.024 ± 0.020 <sup>a</sup>  | n.s              |
| K3             | 731  | c | Pentan-2-one                   | 0.087 ± 0.036 <sup>c</sup> | 0.243 ± 0.021 <sup>bc</sup> | 0.480 ± 0.065 <sup>bc</sup> | 0.504 ± 0.160 <sup>b</sup>  | 0.427 ± 0.166 <sup>bc</sup> | 1.517 ± 0.270 <sup>a</sup>  | ***              |
| K4             | 737  | a | Pentane-2,3-dione              | 0.151 ± 0.081 <sup>b</sup> | 0.000 ± 0.0 <sup>b</sup>    | 0.053 ± 0.003 <sup>b</sup>  | 0.245 ± 0.152 <sup>b</sup>  | 0.175 ± 0.048 <sup>b</sup>  | 0.569 ± 0.222 <sup>a</sup>  | **               |
| K5             | 784  | a | 3-Hydroxybutan-2-one (acetoin) | 0.357 ± 0.136 <sup>a</sup> | 0.242 ± 0.143 <sup>a</sup>  | 0.154 ± 0.088 <sup>a</sup>  | 0.148 ± 0.074 <sup>a</sup>  | 0.306 ± 0.160 <sup>a</sup>  | 0.297 ± 0.198 <sup>a</sup>  | n.s              |
| K6             | 934  | a | Heptan-2-one                   | 0.000 ± 0.0 <sup>b</sup>   | 0.055 ± 0.020 <sup>b</sup>  | 0.037 ± 0.013 <sup>b</sup>  | 0.040 ± 0.004 <sup>b</sup>  | 0.206 ± 0.156 <sup>b</sup>  | 0.639 ± 0.284 <sup>a</sup>  | ***              |
| K7             | 1018 | c | Octane-2,3-dione               | 0.387 ± 0.216 <sup>a</sup> | 0.512 ± 0.239 <sup>a</sup>  | 0.681 ± 0.374 <sup>a</sup>  | 0.634 ± 0.105 <sup>a</sup>  | 0.603 ± 0.141 <sup>a</sup>  | 0.977 ± 0.314 <sup>a</sup>  | n.s              |
| K8             | 1027 | a | Octan-2-one                    | 0.445 ± 0.275 <sup>a</sup> | 0.729 ± 0.338 <sup>a</sup>  | 0.811 ± 0.389 <sup>a</sup>  | 0.791 ± 0.253 <sup>a</sup>  | 0.893 ± 0.081 <sup>a</sup>  | 1.107 ± 0.146 <sup>a</sup>  | n.s              |
| K9             | 1088 | b | (E)-Oct-3-en-2-one             | 0.142 ± 0.121 <sup>a</sup> | 0.133 ± 0.061 <sup>a</sup>  | 0.091 ± 0.029 <sup>a</sup>  | 0.054 ± 0.016 <sup>a</sup>  | 0.089 ± 0.017 <sup>a</sup>  | 0.212 ± 0.097 <sup>a</sup>  | n.s              |
| K10            | 1126 | b | 1-Phenylethanone               | 0.722 ± 0.496 <sup>a</sup> | 0.337 ± 0.262 <sup>a</sup>  | 0.188 ± 0.034 <sup>a</sup>  | 0.207 ± 0.030 <sup>a</sup>  | 0.186 ± 0.077 <sup>a</sup>  | 0.244 ± 0.056 <sup>a</sup>  | n.s              |
| K11            | 1137 | a | Nonan-2-one                    | 0.127 ± 0.052 <sup>a</sup> | 0.279 ± 0.039 <sup>a</sup>  | 0.184 ± 0.031 <sup>a</sup>  | 0.176 ± 0.022 <sup>a</sup>  | 0.279 ± 0.051 <sup>a</sup>  | 0.204 ± 0.115 <sup>a</sup>  | n.s              |
| K12            | 1439 | e | 2-benzofuran-1,3-dione         | 0.147 ± 0.106 <sup>a</sup> | 0.183 ± 0.132 <sup>a</sup>  | 0.194 ± 0.017 <sup>a</sup>  | 0.213 ± 0.048 <sup>a</sup>  | 0.213 ± 0.156 <sup>a</sup>  | 0.148 ± 0.064 <sup>a</sup>  | n.s              |
| <u>Ester</u>   |      |   |                                |                            |                             |                             |                             |                             |                             |                  |
| E1             | 628  | a | Ethyl acetate                  | 0.044 ± 0.038 <sup>a</sup> | 0.020 ± 0.018 <sup>a</sup>  | 0.013 ± 0.013 <sup>a</sup>  | 0.117 ± 0.054 <sup>a</sup>  | 0.065 ± 0.056 <sup>a</sup>  | 0.046 ± 0.034 <sup>a</sup>  | ns               |
| E2             | 743  | c | Ethyl propanoate               | 0.071 ± 0.074 <sup>a</sup> | 0.177 ± 0.180 <sup>a</sup>  | 0.028 ± 0.030 <sup>a</sup>  | 0.137 ± 0.195 <sup>a</sup>  | 0.114 ± 0.055 <sup>a</sup>  | 0.096 ± 0.075 <sup>a</sup>  | n.s              |
| E3             | 831  | d | Ethyl butanoate                | 0.254 ± 0.094 <sup>b</sup> | 0.584 ± 0.242 <sup>ab</sup> | 0.756 ± 0.121 <sup>a</sup>  | 0.640 ± 0.114 <sup>ab</sup> | 0.439 ± 0.249 <sup>ab</sup> | 0.482 ± 0.071 <sup>ab</sup> | *                |

| IVC           | LRI  | I | Compound <sup>A</sup>                                      | D0                          | D5                          | D12                         | D19                         | D26                         | D33                        | Sig <sup>B</sup> |
|---------------|------|---|------------------------------------------------------------|-----------------------------|-----------------------------|-----------------------------|-----------------------------|-----------------------------|----------------------------|------------------|
| E4            | 855  | c | Methyl pentanoate                                          | 0.056 ± 0.049 <sup>a</sup>  | 0.121 ± 0.133 <sup>a</sup>  | 0.110 ± 0.060 <sup>a</sup>  | 0.101 ± 0.027 <sup>a</sup>  | 0.160 ± 0.043 <sup>a</sup>  | 0.193 ± 0.206 <sup>a</sup> | n.s              |
| E5            | 872  | c | Ethyl 2-methylbutanoate                                    | 0.000 ± 0.0 <sup>b</sup>    | 0.042 ± 0.008 <sup>ab</sup> | 0.084 ± 0.051 <sup>a</sup> | **               |
| E6            | 876  | c | Ethyl 3-methyl butanoate                                   | 0.010 ± 0.001 <sup>b</sup>  | 0.014 ± 0.006 <sup>b</sup>  | 0.017 ± 0.003 <sup>b</sup>  | 0.022 ± 0.005 <sup>b</sup>  | 0.138 ± 0.029 <sup>a</sup>  | 0.100 ± 0.038 <sup>a</sup> | ***              |
| E7            | 909  | c | 2-Methylbutyl acetate                                      | 0.076 ± 0.049 <sup>a</sup>  | 1.040 ± 0.792 <sup>a</sup>  | 0.450 ± 0.046 <sup>a</sup>  | 0.292 ± 0.216 <sup>a</sup>  | 0.133 ± 0.016 <sup>a</sup>  | 0.312 ± 0.255 <sup>a</sup> | n.s              |
| E8            | 932  | c | Ethyl pentanoate                                           | 0.000 ± 0.0 <sup>c</sup>    | 0.019 ± 0.004 <sup>bc</sup> | 0.027 ± 0.019 <sup>bc</sup> | 0.016 ± 0.005 <sup>bc</sup> | 0.055 ± 0.012 <sup>b</sup>  | 0.107 ± 0.033 <sup>a</sup> | ***              |
| E9            | 1140 | e | Ethyl (2E,4E)-hexa-2,4-dienoate                            | 0.000 ± 0.0 <sup>b</sup>    | 0.056 ± 0.039 <sup>b</sup>  | 0.038 ± 0.013 <sup>b</sup>  | 0.128 ± 0.016 <sup>b</sup>  | 0.424 ± 0.088 <sup>ab</sup> | 0.977 ± 0.596 <sup>a</sup> | **               |
| E10           | 1154 | c | Methyl octanoate                                           | 0.000 ± 0.0 <sup>b</sup>    | 0.317 ± 0.120 <sup>a</sup>  | 0.308 ± 0.075 <sup>a</sup>  | 0.229 ± 0.035 <sup>a</sup>  | 0.331 ± 0.098 <sup>a</sup>  | 0.324 ± 0.034 <sup>a</sup> | **               |
| E11           | 1224 | b | Ethyl octanoate                                            | 0.000 ± 0.0 <sup>c</sup>    | 0.000 ± 0.0 <sup>c</sup>    | 0.200 ± 0.007 <sup>a</sup>  | 0.262 ± 0.033 <sup>a</sup>  | 0.121 ± 0.042 <sup>b</sup>  | 0.112 ± 0.042 <sup>b</sup> | ***              |
| E12           | 1423 | d | Ethyl decanoate                                            | 0.000 ± 0.0 <sup>b</sup>    | 0.052 ± 0.016 <sup>b</sup>  | 0.177 ± 0.055 <sup>a</sup>  | 0.173 ± 0.057 <sup>a</sup>  | 0.178 ± 0.061 <sup>a</sup>  | 0.188 ± 0.032 <sup>a</sup> | ***              |
| E13           | 1450 | e | Heptyl butanoate                                           | 0.218 ± 0.042 <sup>a</sup>  | 0.316 ± 0.287 <sup>a</sup>  | 0.303 ± 0.077 <sup>a</sup>  | 0.311 ± 0.088 <sup>a</sup>  | 0.460 ± 0.069 <sup>a</sup>  | 0.259 ± 0.027 <sup>a</sup> | n.s              |
| <u>Sulfur</u> |      |   |                                                            |                             |                             |                             |                             |                             |                            |                  |
| S1            | 588  | e | Prop-2-ene-1-thiol<br>(Allyl mercaptan)                    | 1.277 ± 0.826 <sup>ab</sup> | 1.787 ± 0.434 <sup>a</sup>  | 0.203 ± 0.142 <sup>bc</sup> | 0.382 ± 0.279 <sup>bc</sup> | 0.167 ± 0.001 <sup>c</sup>  | 0.144 ± 0.049 <sup>c</sup> | **               |
| S2            | 714  | c | 3-methylsulfanylprop-1-ene<br>(Allyl methyl sulfide)       | 2.281 ± 1.099 <sup>a</sup>  | 1.268 ± 0.410 <sup>a</sup>  | 2.209 ± 0.537 <sup>a</sup>  | 1.513 ± 0.699 <sup>a</sup>  | 1.031 ± 0.785 <sup>a</sup>  | 0.423 ± 0.203 <sup>a</sup> | *                |
| S3            | 772  | c | (methyldisulfanyl)methane<br>(Dimethyl disulfide)          | 0.984 ± 0.836 <sup>a</sup>  | 0.180 ± 0.085 <sup>a</sup>  | 0.071 ± 0.025 <sup>a</sup>  | 0.106 ± 0.019 <sup>a</sup>  | 0.056 ± 0.008 <sup>a</sup>  | 0.113 ± 0.036 <sup>a</sup> | *                |
| S4            | 887  | c | 3-prop-2-enylsulfanylprop-1-ene<br>(Allyl sulfide)         | 0.656 ± 0.142 <sup>a</sup>  | 1.020 ± 0.019 <sup>a</sup>  | 1.080 ± 0.199 <sup>a</sup>  | 1.491 ± 0.140 <sup>a</sup>  | 1.446 ± 0.452 <sup>a</sup>  | 1.033 ± 0.949 <sup>a</sup> | n.s              |
| S5            | 952  | e | 3-(methyldisulfanyl)prop-1-ene<br>(Allyl methyl disulfide) | 21.32 ± 9.695 <sup>a</sup>  | 19.025 ± 2.023 <sup>a</sup> | 17.810 ± 2.84 <sup>a</sup>  | 19.597 ± 0.192 <sup>a</sup> | 18.857 ± 3.47 <sup>a</sup>  | 10.709 ± 2.70 <sup>a</sup> | n.s              |
| S6            | 1115 | c | 3-(prop-2-enyl)disulfanylprop-1-ene<br>(Allyl disulfide)   | 17.749 ± 11.05 <sup>a</sup> | 10.361 ± 5.94 <sup>a</sup>  | 11.298 ± 2.66 <sup>a</sup>  | 12.881 ± 1.82 <sup>a</sup>  | 9.858 ± 4.653 <sup>a</sup>  | 13.726 ± 6.71 <sup>a</sup> | n.s              |

| IVC                   | LRI  | I | Compound <sup>A</sup>                                      | D0                          | D5                          | D12                         | D19                         | D26                        | D33                         | Sig <sup>B</sup> |
|-----------------------|------|---|------------------------------------------------------------|-----------------------------|-----------------------------|-----------------------------|-----------------------------|----------------------------|-----------------------------|------------------|
| S7                    | 1346 | e | 3-(prop-2-enyltrisulfanyl)prop-1-ene (Allyl trisulfide)    | 0.529 ± 0.331 <sup>a</sup>  | 0.348 ± 0.108 <sup>a</sup>  | 0.277 ± 0.092 <sup>a</sup>  | 0.421 ± 0.177 <sup>a</sup>  | 0.373 ± 0.066 <sup>a</sup> | 0.237 ± 0.094 <sup>a</sup>  | n.s              |
| <u>Aromatic Group</u> |      |   |                                                            |                             |                             |                             |                             |                            |                             |                  |
| B1                    | 614  | c | 2-Methylfuran                                              | 0.367 ± 0.095 <sup>a</sup>  | 0.310 ± 0.023 <sup>ab</sup> | 0.095 ± 0.034 <sup>c</sup>  | 0.039 ± 0.016 <sup>c</sup>  | 0.067 ± 0.054 <sup>c</sup> | 0.175 ± 0.086 <sup>bc</sup> | ***              |
| B2                    | 677  | c | Benzene                                                    | 0.574 ± 0.420 <sup>a</sup>  | 0.130 ± 0.136 <sup>a</sup>  | 0.061 ± 0.011 <sup>a</sup>  | 0.079 ± 0.030 <sup>a</sup>  | 0.219 ± 0.128 <sup>a</sup> | 0.255 ± 0.183 <sup>a</sup>  | n.s              |
| B3                    | 790  | c | Toluene                                                    | 1.400 ± 0.151 <sup>ab</sup> | 2.270 ± 1.175 <sup>a</sup>  | 0.781 ± 0.118 <sup>ab</sup> | 0.800 ± 0.242 <sup>ab</sup> | 0.378 ± 0.063 <sup>b</sup> | 1.007 ± 0.707 <sup>ab</sup> | *                |
| B4                    | 892  | c | 1,4-Xylene                                                 | 0.314 ± 0.216 <sup>a</sup>  | 0.242 ± 0.195 <sup>a</sup>  | 0.172 ± 0.031 <sup>a</sup>  | 0.152 ± 0.003 <sup>a</sup>  | 0.171 ± 0.098 <sup>a</sup> | 0.369 ± 0.334 <sup>a</sup>  | n.s              |
| B5                    | 915  | e | 1,2-Xylene                                                 | 0.495 ± 0.425 <sup>a</sup>  | 0.202 ± 0.252 <sup>a</sup>  | 0.020 ± 0.004 <sup>a</sup>  | 0.018 ± 0.006 <sup>a</sup>  | 0.088 ± 0.123 <sup>a</sup> | 0.159 ± 0.253 <sup>a</sup>  | n.s              |
| B6                    | 916  | c | Styrene                                                    | 0.278 ± 0.196 <sup>a</sup>  | 0.191 ± 0.135 <sup>a</sup>  | 0.031 ± 0.005 <sup>a</sup>  | 0.030 ± 0.006 <sup>a</sup>  | 0.077 ± 0.061 <sup>a</sup> | 0.131 ± 0.155 <sup>a</sup>  | n.s              |
| B7                    | 972  | c | Propyl benzene                                             | 0.023 ± 0.018 <sup>a</sup>  | 0.025 ± 0.022 <sup>a</sup>  | 0.021 ± 0.014 <sup>a</sup>  | 0.015 ± 0.021 <sup>a</sup>  | 0.052 ± 0.069 <sup>a</sup> | 0.050 ± 0.013 <sup>a</sup>  | n.s              |
| B8                    | 1039 | e | 1-methyl-2-propan-2-ylbenzene (o-cymene)                   | 1.145 ± 0.417 <sup>a</sup>  | 1.322 ± 1.112 <sup>a</sup>  | 0.534 ± 0.092 <sup>a</sup>  | 0.635 ± 0.083 <sup>a</sup>  | 1.453 ± 1.391 <sup>a</sup> | 1.089 ± 1.023 <sup>a</sup>  | n.s              |
| B9                    | 1184 | e | 1-methyl-3-propan-2-ylbenzene (m-cymene)                   | 0.089 ± 0.0105 <sup>a</sup> | 0.538 ± 0.536 <sup>a</sup>  | 0.200 ± 0.028 <sup>a</sup>  | 0.144 ± 0.040 <sup>a</sup>  | 0.255 ± 0.016 <sup>a</sup> | 0.156 ± 0.018 <sup>a</sup>  | n.s              |
| B10                   | 1232 | e | Naphthalene                                                | 0.069 ± 0.024 <sup>a</sup>  | 0.114 ± 0.046 <sup>a</sup>  | 0.086 ± 0.010 <sup>a</sup>  | 0.061 ± 0.004 <sup>a</sup>  | 0.053 ± 0.016 <sup>a</sup> | 0.075 ± 0.028 <sup>a</sup>  | n.s              |
| <u>Terpens</u>        |      |   |                                                            |                             |                             |                             |                             |                            |                             |                  |
| T1                    | 936  | c | 4-methyl-1-propan-2-ylbicyclo[3.1.0]hex-3-ene (α-Thujene)  | 0.443 ± 0.457 <sup>a</sup>  | 0.421 ± 0.423 <sup>a</sup>  | 0.154 ± 0.020 <sup>a</sup>  | 0.148 ± 0.032 <sup>a</sup>  | 0.185 ± 0.040 <sup>a</sup> | 0.148 ± 0.042 <sup>a</sup>  | n.s              |
| T2                    | 939  | a | 4,6,6-trimethylbicyclo[3.1.1]hept-3-ene (α-Pinene)         | 0.266 ± 0.232 <sup>a</sup>  | 1.150 ± 0.928 <sup>a</sup>  | 0.780 ± 0.069 <sup>a</sup>  | 0.764 ± 0.109 <sup>a</sup>  | 1.078 ± 0.613 <sup>a</sup> | 1.539 ± 1.487 <sup>a</sup>  | n.s              |
| T3                    | 985  | e | 4-methylidene-1-propan-2-ylbicyclo[3.1.0]hexane (Sabinene) | 0.064 ± 0.013 <sup>a</sup>  | 0.088 ± 0.014 <sup>a</sup>  | 0.064 ± 0.022 <sup>a</sup>  | 0.071 ± 0.012 <sup>a</sup>  | 0.057 ± 0.022 <sup>a</sup> | 0.088 ± 0.026 <sup>a</sup>  | n.s              |

| IVC | LRI  | I | Compound <sup>A</sup>                                                                  | D0                             | D5                              | D12                             | D19                             | D26                             | D33                             | Sig <sup>B</sup> |
|-----|------|---|----------------------------------------------------------------------------------------|--------------------------------|---------------------------------|---------------------------------|---------------------------------|---------------------------------|---------------------------------|------------------|
| T4  | 1025 | c | 1-methyl-4-propan-2-ylcyclohexa-1,3-diene ( $\alpha$ -Terpinene)                       | 0.658 $\pm$ 0.200 <sup>a</sup> | 0.513 $\pm$ 0.063 <sup>a</sup>  | 0.374 $\pm$ 0.107 <sup>a</sup>  | 0.391 $\pm$ 0.034 <sup>a</sup>  | 0.477 $\pm$ 0.208 <sup>a</sup>  | 0.397 $\pm$ 0.148 <sup>a</sup>  | n.s              |
| T5  | 1045 | b | (4R)-1-methyl-4-prop-1-en-2-ylcyclohexene (Limonene)                                   | 0.275 $\pm$ 0.132 <sup>c</sup> | 0.811 $\pm$ 0.114 <sup>a</sup>  | 0.559 $\pm$ 0.142 <sup>ab</sup> | 0.463 $\pm$ 0.033 <sup>bc</sup> | 0.522 $\pm$ 0.012 <sup>bc</sup> | 0.510 $\pm$ 0.048 <sup>bc</sup> | **               |
| T6  | 1068 | c | 1-methyl-4-propan-2-ylidenecyclohexene (Terpinolene)                                   | 0.901 $\pm$ 0.088 <sup>a</sup> | 1.094 $\pm$ 0.374 <sup>a</sup>  | 0.785 $\pm$ 0.110 <sup>a</sup>  | 0.805 $\pm$ 0.032 <sup>a</sup>  | 0.879 $\pm$ 0.029 <sup>a</sup>  | 0.962 $\pm$ 0.433 <sup>a</sup>  | n.s              |
| T7  | 1160 | b | 4-methyl-1-propan-2-ylbicyclo[3.1.0]hex-2-ene (Thujene)                                | 1.672 $\pm$ 0.596 <sup>a</sup> | 1.239 $\pm$ 0.328 <sup>a</sup>  | 0.942 $\pm$ 0.212 <sup>a</sup>  | 0.897 $\pm$ 0.105 <sup>a</sup>  | 1.106 $\pm$ 0.326 <sup>a</sup>  | 1.120 $\pm$ 0.220 <sup>a</sup>  | n.s              |
| T8  | 1223 | b | 4-methyl-1-propan-2-ylcyclohex-3-en-1-ol (Terpinen-4-ol)                               | 0.778 $\pm$ 0.367 <sup>b</sup> | 1.696 $\pm$ 0.098 <sup>a</sup>  | 1.445 $\pm$ 0.236 <sup>a</sup>  | 1.260 $\pm$ 0.040 <sup>ab</sup> | 1.533 $\pm$ 0.191 <sup>a</sup>  | 1.282 $\pm$ 0.147 <sup>ab</sup> | **               |
| T9  | 1228 | e | 4,7,7-trimethylbicyclo[2.2.1]heptan-3-ol (Borneol)                                     | 0.181 $\pm$ 0.080 <sup>a</sup> | 0.367 $\pm$ 0.076 <sup>a</sup>  | 0.320 $\pm$ 0.051 <sup>a</sup>  | 0.236 $\pm$ 0.024 <sup>a</sup>  | 0.289 $\pm$ 0.099 <sup>a</sup>  | 0.266 $\pm$ 0.066 <sup>a</sup>  | n.s              |
| T10 | 1244 | e | 2-(4-methylcyclohex-3-enyl)propan-2-ol ( $\alpha$ -Terpineol)                          | 0.244 $\pm$ 0.07 <sup>c</sup>  | 0.707 $\pm$ 0.058 <sup>ab</sup> | 0.688 $\pm$ 0.101 <sup>ab</sup> | 0.545 $\pm$ 0.079 <sup>b</sup>  | 0.766 $\pm$ 0.043 <sup>a</sup>  | 0.655 $\pm$ 0.059 <sup>ab</sup> | ***              |
| T11 | 1362 | e | 4,7,7-trimethylbicyclo[4.1.0]hept-3-ene ((+)-3-Carene)                                 | 0.623 $\pm$ 0.180 <sup>a</sup> | 0.504 $\pm$ 0.130 <sup>ab</sup> | 0.316 $\pm$ 0.057 <sup>b</sup>  | 0.381 $\pm$ 0.080 <sup>ab</sup> | 0.438 $\pm$ 0.027 <sup>ab</sup> | 0.442 $\pm$ 0.045 <sup>ab</sup> | *                |
| T12 | 1384 | b | 5-methyl-2-propan-2-ylphenol (Thymol)                                                  | 0.049 $\pm$ 0.006 <sup>b</sup> | 1.094 $\pm$ 0.181 <sup>ab</sup> | 1.622 $\pm$ 0.433 <sup>ab</sup> | 1.438 $\pm$ 0.118 <sup>ab</sup> | 1.923 $\pm$ 1.330 <sup>a</sup>  | 2.096 $\pm$ 0.646 <sup>a</sup>  | *                |
| T13 | 1396 | b | 2-methyl-5-propan-2-ylphenol (Carvacrol)                                               | 0.526 $\pm$ 0.272 <sup>a</sup> | 0.204 $\pm$ 0.039 <sup>a</sup>  | 0.307 $\pm$ 0.095 <sup>a</sup>  | 0.318 $\pm$ 0.030 <sup>a</sup>  | 0.525 $\pm$ 0.052 <sup>a</sup>  | 0.383 $\pm$ 0.092 <sup>a</sup>  | n.s              |
| T14 | 1445 | e | (1R,4Z,9S)-4,11,11-trimethyl-8-methylidenebicyclo[7.2.0]undec-4-ene (Isocaryophyllene) | 0.663 $\pm$ 0.236 <sup>a</sup> | 0.717 $\pm$ 0.403 <sup>a</sup>  | 0.917 $\pm$ 0.103 <sup>a</sup>  | 1.005 $\pm$ 0.178 <sup>a</sup>  | 0.929 $\pm$ 0.571 <sup>a</sup>  | 0.688 $\pm$ 0.370 <sup>a</sup>  | n.s              |



| IVC | LRI  | I | Compound <sup>A</sup>                                                                         | D0                             | D5                              | D12                            | D19                             | D26                            | D33                            | Sig |
|-----|------|---|-----------------------------------------------------------------------------------------------|--------------------------------|---------------------------------|--------------------------------|---------------------------------|--------------------------------|--------------------------------|-----|
| T15 | 1457 | e | (1R,4E,9S)-4,11,11-trimethyl-8-methylidenebicyclo[7.2.0]undec-4-ene ( $\beta$ -Caryophyllene) | 29.15 $\pm$ 14.85 <sup>a</sup> | 16.572 $\pm$ 4.243 <sup>a</sup> | 10.394 $\pm$ 0.11 <sup>a</sup> | 12.970 $\pm$ 3.241 <sup>a</sup> | 21.394 $\pm$ 9.53 <sup>a</sup> | 13.916 $\pm$ 1.67 <sup>a</sup> | n.s |
| T16 | 1497 | e | (1E,4E,8E)-2,6,6,9-tetramethylcycloundeca-1,4,8-triene ( $\alpha$ -Caryophyllene)             | 1.497 $\pm$ 0.662 <sup>a</sup> | 0.744 $\pm$ 0.484 <sup>a</sup>  | 0.431 $\pm$ 0.164 <sup>a</sup> | 1.136 $\pm$ 0.393 <sup>a</sup>  | 0.954 $\pm$ 0.398 <sup>a</sup> | 0.495 $\pm$ 0.070 <sup>a</sup> | n.s |

IVC: Identification of volatile compounds

LRI: Linear Retention Index

I: Volatile compounds identified by: (a) Mass spectrum, LRI of authentic standard and LRI of bibliography; (b) Mass spectrum and LRI of authentic standard; (c) Mass spectrum and LRI of bibliography; (d) LRI of authentic standard and bibliography; (e) Mass spectrum.

<sup>A</sup>IUPAC names

Sig: Significance of the effect of ripening time: \*significant (p<0.05), \*\*significant (p<0.01), \*\*\*Significant (p<0.001), n.s, no significance.

<sup>abc</sup> Different letter in row show significant differences p<0.05 by Tukey test.
